# Supplementary material for: 2-Aminopurine-based quencher-free DNA tweezers with fluorescence properties well tuned by surrounding bases
Source: Royal Society of Chemistry journal article supplement (doi:10.1039/d3ay01973j), 2023-12-19
Supplement: d3ay01973j1.pdf [file d3ay01973j1.pdf]

## Supporting information

### **2-Aminopurine-based quencher-free DNA tweezer with well-tunable fluorescence property by surrounding bases**

Fangfang Yang, Shuang Li, Jialiang Wu, and Shufeng Liu\*

College of Chemistry and Chemical Engineering, Yantai University, 30 Qingquan Road,  
Yantai 264005, China

\*Corresponding authors. E-mail: sliu@ytu.edu.cn.

**Table S1** DNA sequences used in the experiment

|      | Strands   | Sequences                                                    |
|------|-----------|--------------------------------------------------------------|
|      | F         | CGCATAGACCGTGATTGTTACCAGCGTTAGTTCAGACAGTAGG<br>ACTCCTGCTACGA |
|      | $\bar{F}$ | TCGTAGCAGGAGTCCTACTGTCTGAACTAACGCTGGTAACAAT<br>CACGGTCTATGCG |
| Tw-1 | A         | TGCCTTGTAAGAGCGACCATA <u>A</u> CAACCTGGAATGCTTCGGAT          |
|      | B         | GTCGCTCTTACAAGGCACTGGTAACAATCACGGTCTATGCG                    |
|      | C         | GGAGTCCTACTGTCTGAACTAACGATCCGAAGCATTCCAGG                    |
| Tw-2 | A         | TGCCTTGTAAGAGCGACCATA <u>A</u> CAACCTGGAATGCTTCGGAT          |
|      | B         | GGTCGCTCTTACAAGGCACTGGTAACAATCACGGTCTATGCG                   |
|      | C         | GGAGTCCTACTGTCTGAACTAACGATCCGAAGCATTCCAGGT                   |
| Tw-3 | A         | TGCCTTGTAAGAGCGACCATA <u>A</u> CAACCTGGAATGCTTCGGAT          |
|      | B         | TGGTCGCTCTTACAAGGCACTGGTAACAATCACGGTCTATGCG                  |
|      | C         | GGAGTCCTACTGTCTGAACTAACGATCCGAAGCATTCCAGGTT                  |
| Tw-4 | A         | TGCCTTGTAAGAGCGACCATA <u>A</u> CAACCTGGAATGCTTCGGAT          |
|      | B         | ATGGTCGCTCTTACAAGGCACTGGTAACAATCACGGTCTATGC<br>G             |
|      | C         | GGAGTCCTACTGTCTGAACTAACGATCCGAAGCATTCCAGGTT<br>G             |
| Tw-5 | A         | TGCCTTGTAAGAGCGACC <u>AA</u> AAACCTGGAATGCTTCGGAT            |
|      | B         | TTGGTCGCTCTTACAAGGCACTGGTAACAATCACGGTCTATGC<br>G             |
|      | C         | GGAGTCCTACTGTCTGAACTAACGATCCGAAGCATTCCAGGTT<br>T             |
| Tw-6 | A         | TGCCTTGTAAGAGCGACCATA <u>A</u> TAAACCTGGAATGCTTCGGAT         |
|      | B         | ATGGTCGCTCTTACAAGGCACTGGTAACAATCACGGTCTATGC<br>G             |
|      | C         | GGAGTCCTACTGTCTGAACTAACGATCCGAAGCATTCCAGGTT<br>A             |
| Tw-7 | A         | TGCCTTGTAAGAGCGACCAC <u>A</u> CAACCTGGAATGCTTCGGAT           |
|      | B         | GTGGTCGCTCTTACAAGGCACTGGTAACAATCACGGTCTATGC<br>G             |
|      | C         | GGAGTCCTACTGTCTGAACTAACGATCCGAAGCATTCCAGGTT                  |

|       |   |                                                     |
|-------|---|-----------------------------------------------------|
|       |   | G                                                   |
| Tw-8  | A | TGCCTTGTAAGAGCGACCAG <u>A</u> GAAACCTGGAATGCTTCGGAT |
|       | B | CTGGTCGCTCTTACAAGGCACTGGTAACAATCACGGTCTATGC<br>G    |
|       | C | GGAGTCCTACTGTCTGAACTAACGATCCGAAGCATTCCAGGTT<br>C    |
| Tw-9  | A | TGCCTTGTAAGAGCGACCAA <u>A</u> CAACCTGGAATGCTTCGGAT  |
|       | B | TTGGTCGCTCTTACAAGGCACTGGTAACAATCACGGTCTATGC<br>G    |
|       | C | GGAGTCCTACTGTCTGAACTAACGATCCGAAGCATTCCAGGTT<br>G    |
| Tw-10 | A | TGCCTTGTAAGAGCGACCACA <u>A</u> AAACCTGGAATGCTTCGGAT |
|       | B | GTGGTCGCTCTTACAAGGCACTGGTAACAATCACGGTCTATGC<br>G    |
|       | C | GGAGTCCTACTGTCTGAACTAACGATCCGAAGCATTCCAGGTT<br>T    |
| Tw-11 | A | TGCCTTGTAAGAGCGACCAA <u>A</u> GAAACCTGGAATGCTTCGGAT |
|       | B | TTGGTCGCTCTTACAAGGCACTGGTAACAATCACGGTCTATGC<br>G    |
|       | C | GGAGTCCTACTGTCTGAACTAACGATCCGAAGCATTCCAGGTT<br>C    |
| Tw-12 | A | TGCCTTGTAAGAGCGACCAG <u>A</u> AAACCTGGAATGCTTCGGAT  |
|       | B | CTGGTCGCTCTTACAAGGCACTGGTAACAATCACGGTCTATGC<br>G    |
|       | C | GGAGTCCTACTGTCTGAACTAACGATCCGAAGCATTCCAGGTT<br>T    |
| Tw-13 | A | TGCCTTGTAAGAGCGACCAA <u>A</u> TAACCTGGAATGCTTCGGAT  |
|       | B | TTGGTCGCTCTTACAAGGCACTGGTAACAATCACGGTCTATGC<br>G    |
|       | C | GGAGTCCTACTGTCTGAACTAACGATCCGAAGCATTCCAGGTT<br>A    |
| Tw-14 | A | TGCCTTGTAAGAGCGACCAT <u>A</u> AAACCTGGAATGCTTCGGAT  |
|       | B | ATGGTCGCTCTTACAAGGCACTGGTAACAATCACGGTCTATGC<br>G    |
|       | C | GGAGTCCTACTGTCTGAACTAACGATCCGAAGCATTCCAGGTT         |

|       |   |                                                    |
|-------|---|----------------------------------------------------|
|       |   | T                                                  |
| Tw-15 | A | TGCCTTGTAAGAGCGACCAA <u>A</u> CAACCTGGAATGCTTCGGAT |
|       | B | ATGGTCGCTCTTACAAGGCACTGGTAACAATCACGGTCTATGC<br>G   |
|       | C | GGAGTCCTACTGTCTGAACTAACGATCCGAAGCATTCCAGGTT<br>G   |
| Tw-16 | A | TGCCTTGTAAGAGCGACCAA <u>A</u> CAACCTGGAATGCTTCGGAT |
|       | B | CTGGTCGCTCTTACAAGGCACTGGTAACAATCACGGTCTATGC<br>G   |
|       | C | GGAGTCCTACTGTCTGAACTAACGATCCGAAGCATTCCAGGTT<br>G   |
| Tw-17 | A | TGCCTTGTAAGAGCGACCAA <u>A</u> CAACCTGGAATGCTTCGGAT |
|       | B | GTGGTCGCTCTTACAAGGCACTGGTAACAATCACGGTCTATGC<br>G   |
|       | C | GGAGTCCTACTGTCTGAACTAACGATCCGAAGCATTCCAGGTT<br>G   |
| Tw-18 | A | TGCCTTGTAAGAGCGACCAA <u>A</u> CAACCTGGAATGCTTCGGAT |
|       | B | TTGGTCGCTCTTACAAGGCACTGGTAACAATCACGGTCTATGC<br>G   |
|       | C | GGAGTCCTACTGTCTGAACTAACGATCCGAAGCATTCCAGGTT<br>A   |
| Tw-19 | A | TGCCTTGTAAGAGCGACCAA <u>A</u> CAACCTGGAATGCTTCGGAT |
|       | B | TTGGTCGCTCTTACAAGGCACTGGTAACAATCACGGTCTATGC<br>G   |
|       | C | GGAGTCCTACTGTCTGAACTAACGATCCGAAGCATTCCAGGTT<br>C   |
| Tw-20 | A | TGCCTTGTAAGAGCGACCAA <u>A</u> CAACCTGGAATGCTTCGGAT |
|       | B | TTGGTCGCTCTTACAAGGCACTGGTAACAATCACGGTCTATGC<br>G   |
|       | C | GGAGTCCTACTGTCTGAACTAACGATCCGAAGCATTCCAGGTT<br>T   |

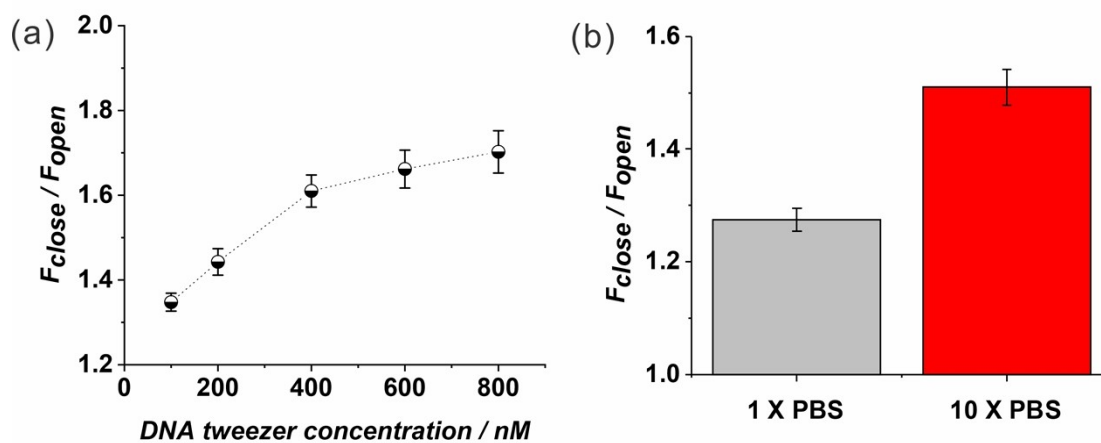

**Fig. S1** (a) Effects of DNA tweezer concentration on the fluorescence intensity of the 2-AP based DNA tweezer nanomachine. (b) Fluorescence intensity ratio of the closed and open DNA tweezer (400 nM) by fuel strand input (400 nM) at a low or high saline PBS buffer. Herein, Tw-2 (detailed sequences are listed in Table S1) was used for this analysis. Errors were obtained from three repeated experiments.

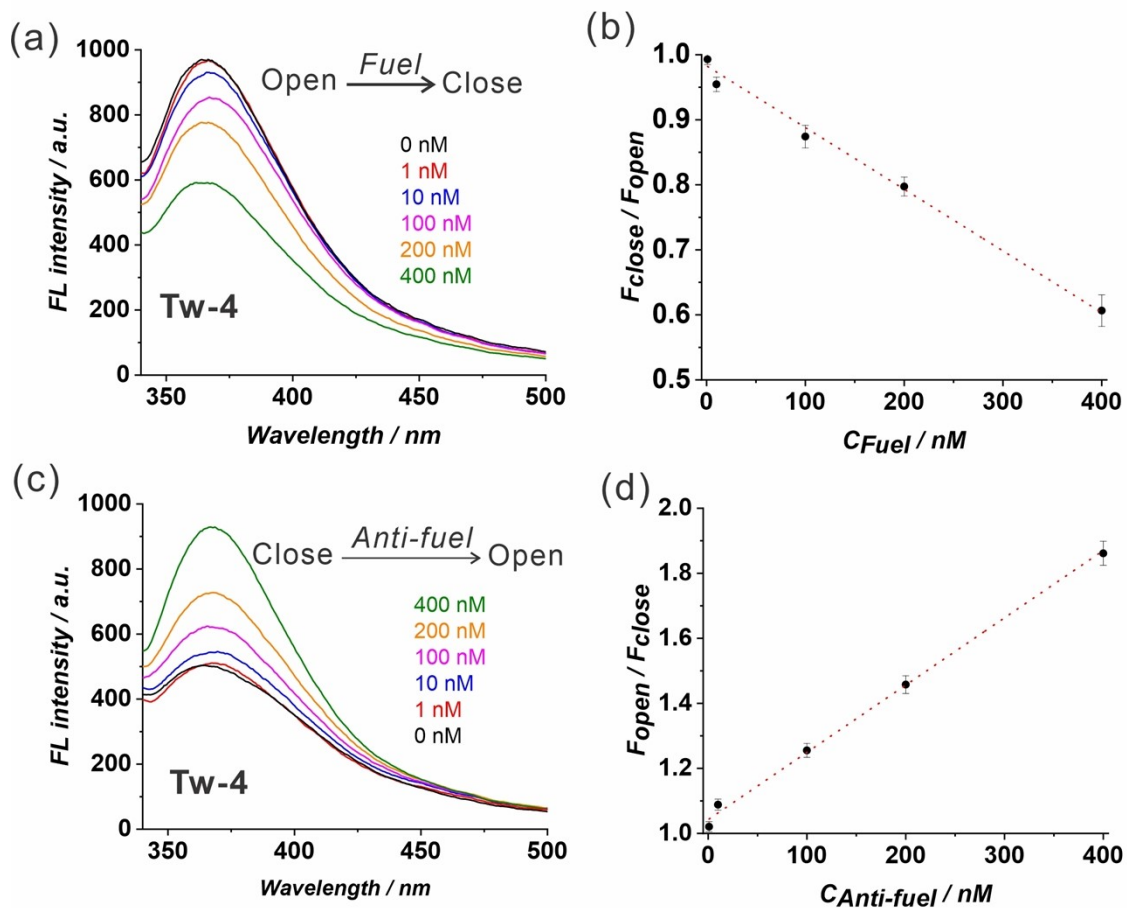

**Fig. S2** Detailed fluorescence spectrum (a) and decrease in fluorescence intensity (b) with fuel concentrations when the structure of the tweezer (Tw-4) changes from open to closed upon the addition of fuel strand. Detailed fluorescence spectrum (c) and increase in fluorescence intensity (d) with anti-fuel concentrations when the structure of the tweezer (Tw-4) changes from closed to open upon the addition of anti-fuel strand.

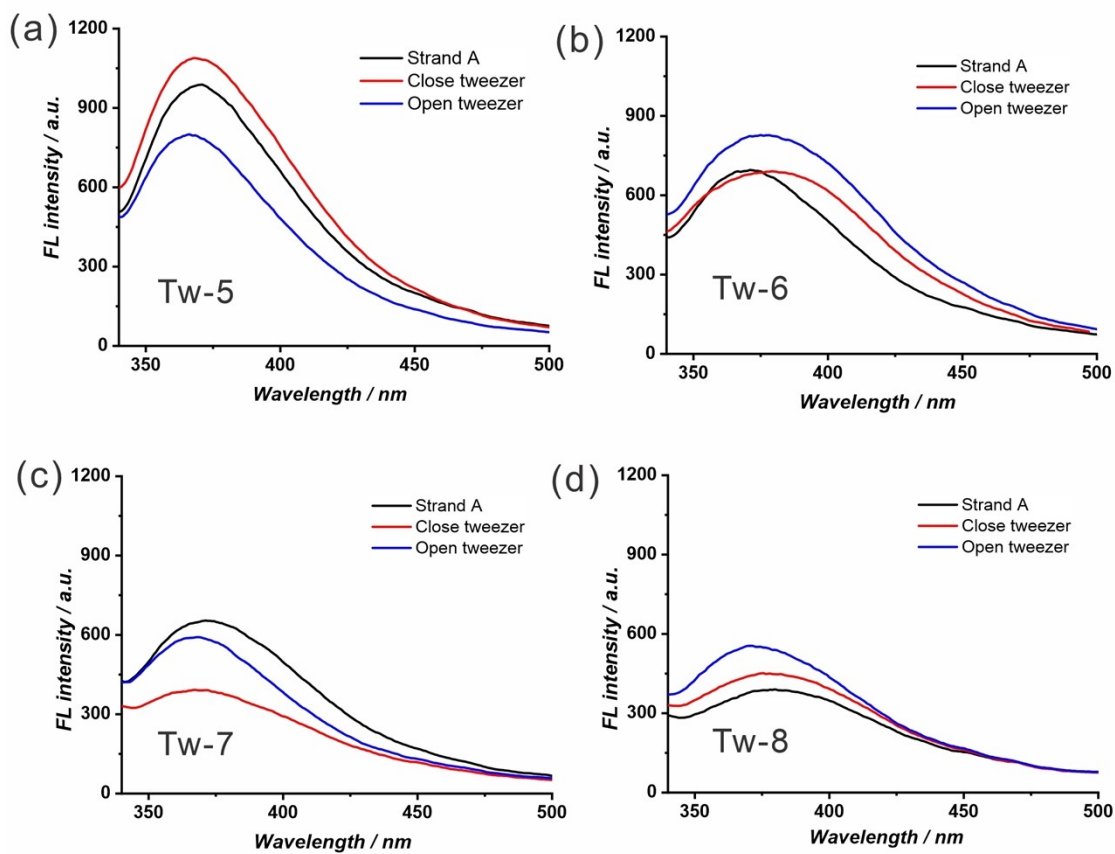

**Fig. S3** Fluorescence spectra of the four DNA tweezers: (a) Tw-5; (b) Tw-6; (c) Tw-7; and (d) Tw-8 with a concentration of 400 nM.

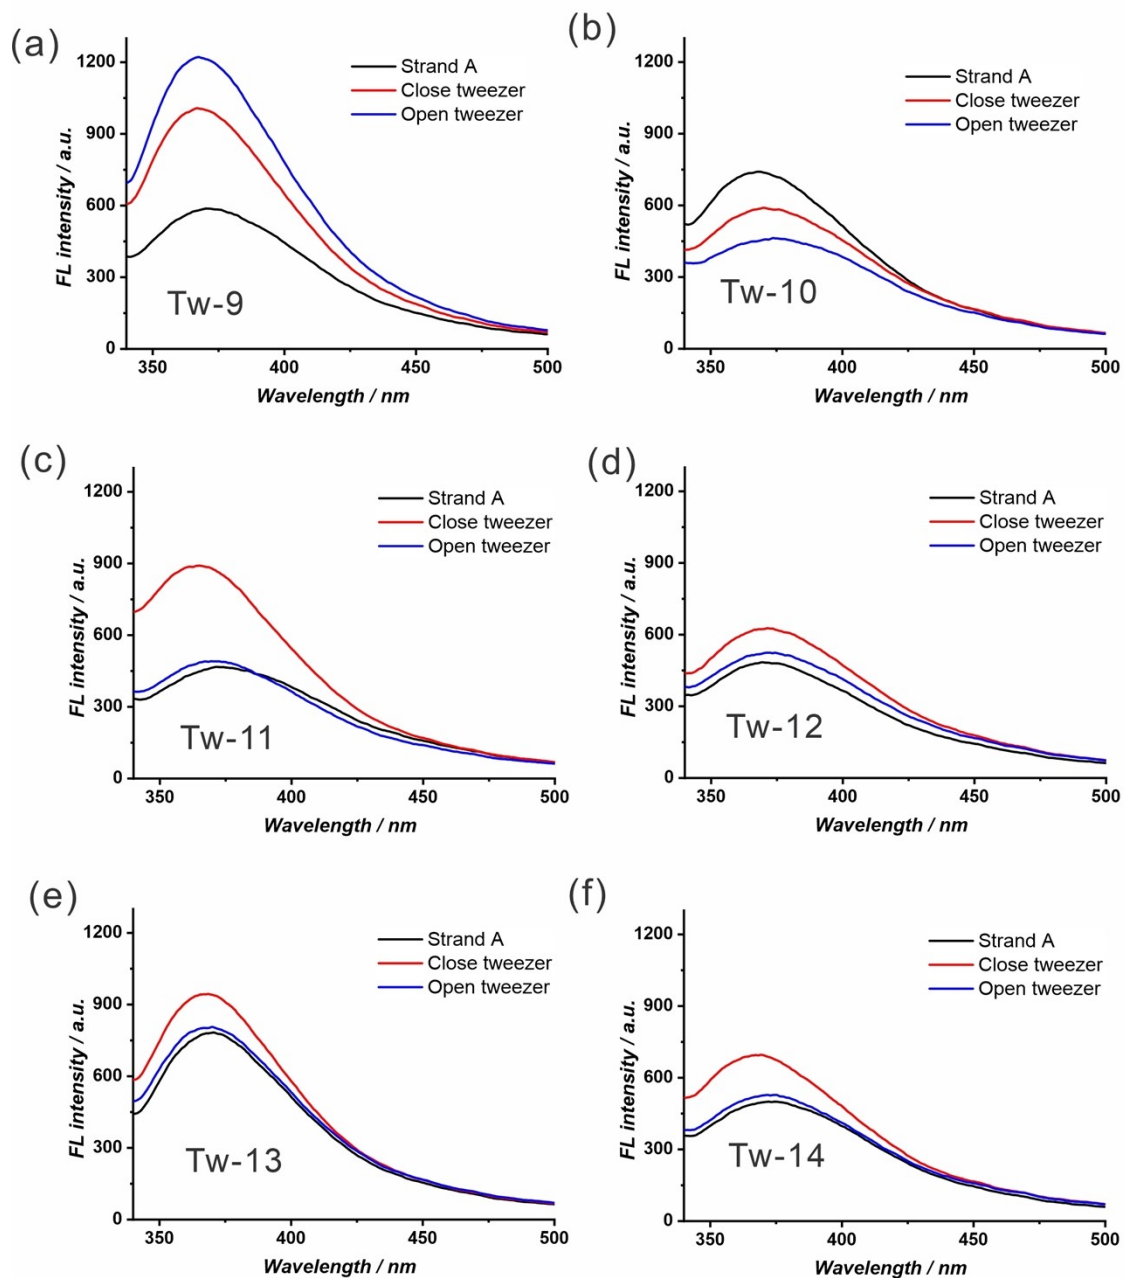

**Fig. S4** Fluorescence spectra of the six DNA tweezers: (a) Tw-9; (b) Tw-10; (c) Tw-11; (d) Tw-12; (e) Tw-13; (f) Tw-14 at a concentration of 400 nM.



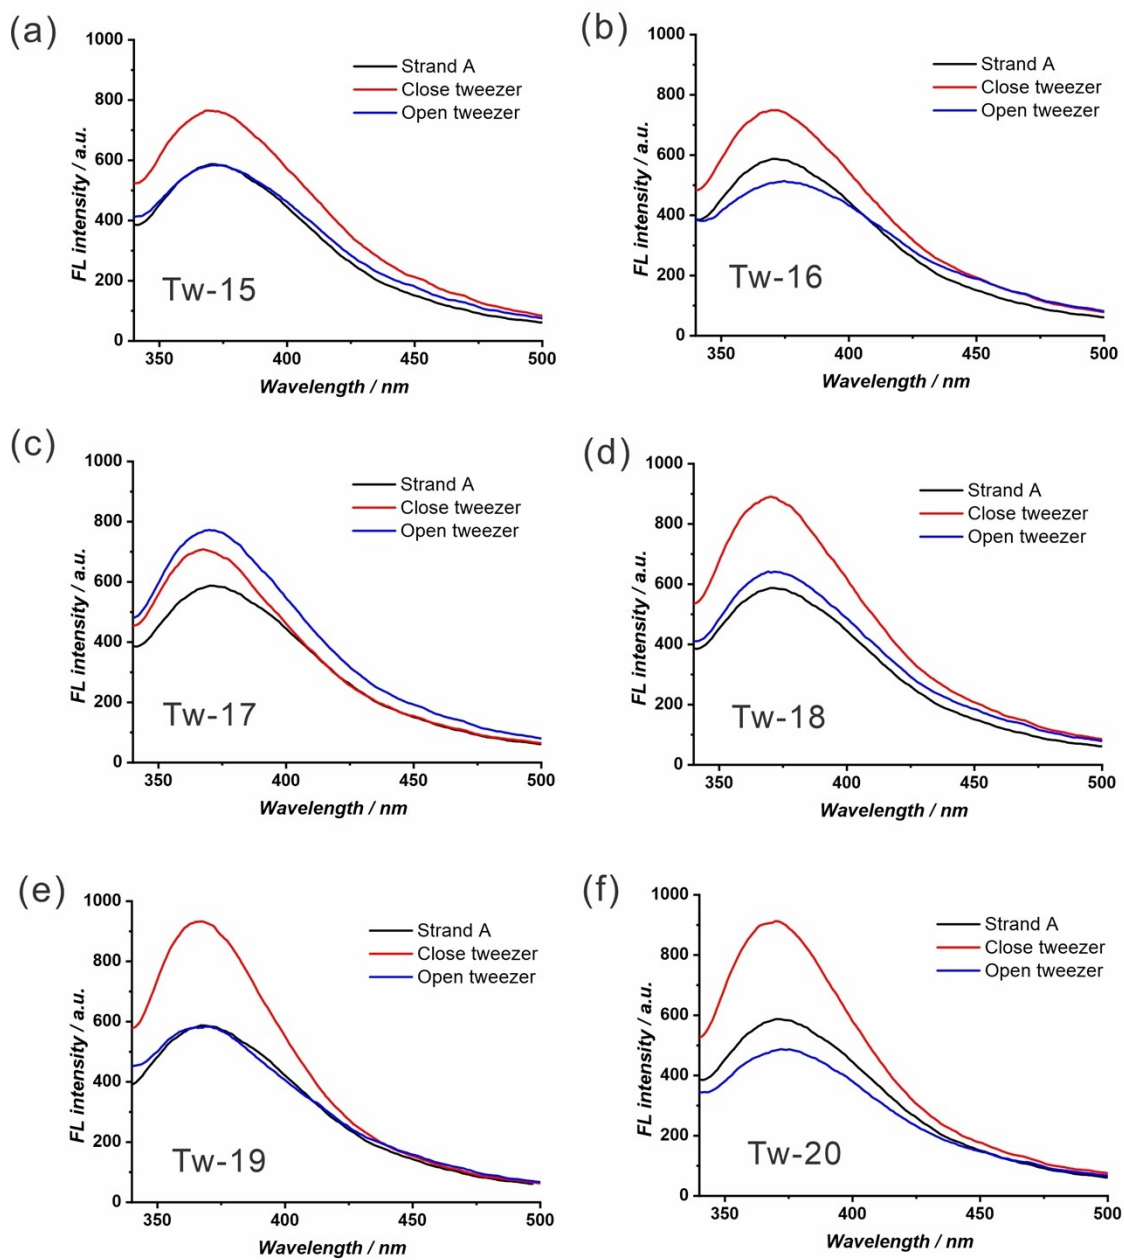

**Fig. S5** Fluorescence spectra of (a) Tw-15; (b) Tw-16; (c) Tw-17; (d) Tw-18; (e) Tw-19; (f) Tw-20 at a concentration of 400 nM.
